# Supplementary material for: Patterns in the Sequential Treatment of Patients With Rheumatoid Arthritis Starting a Biologic or Targeted Synthetic Disease‐Modifying Antirheumatic Drug: 10‐Year Experience From a US‐Based Registry
Source: PubMed Central journal article supplement — ACR Open Rheumatol. 2023 Oct 26;6(1):5–13. doi: 10.1002/acr2.11621 (PMC10789300; doi:10.1002/acr2.11621), 2023-10-26
Supplement: ACR2-6-5-s002.pdf [file ACR2-6-5-s002.pdf]

## Supplementary material

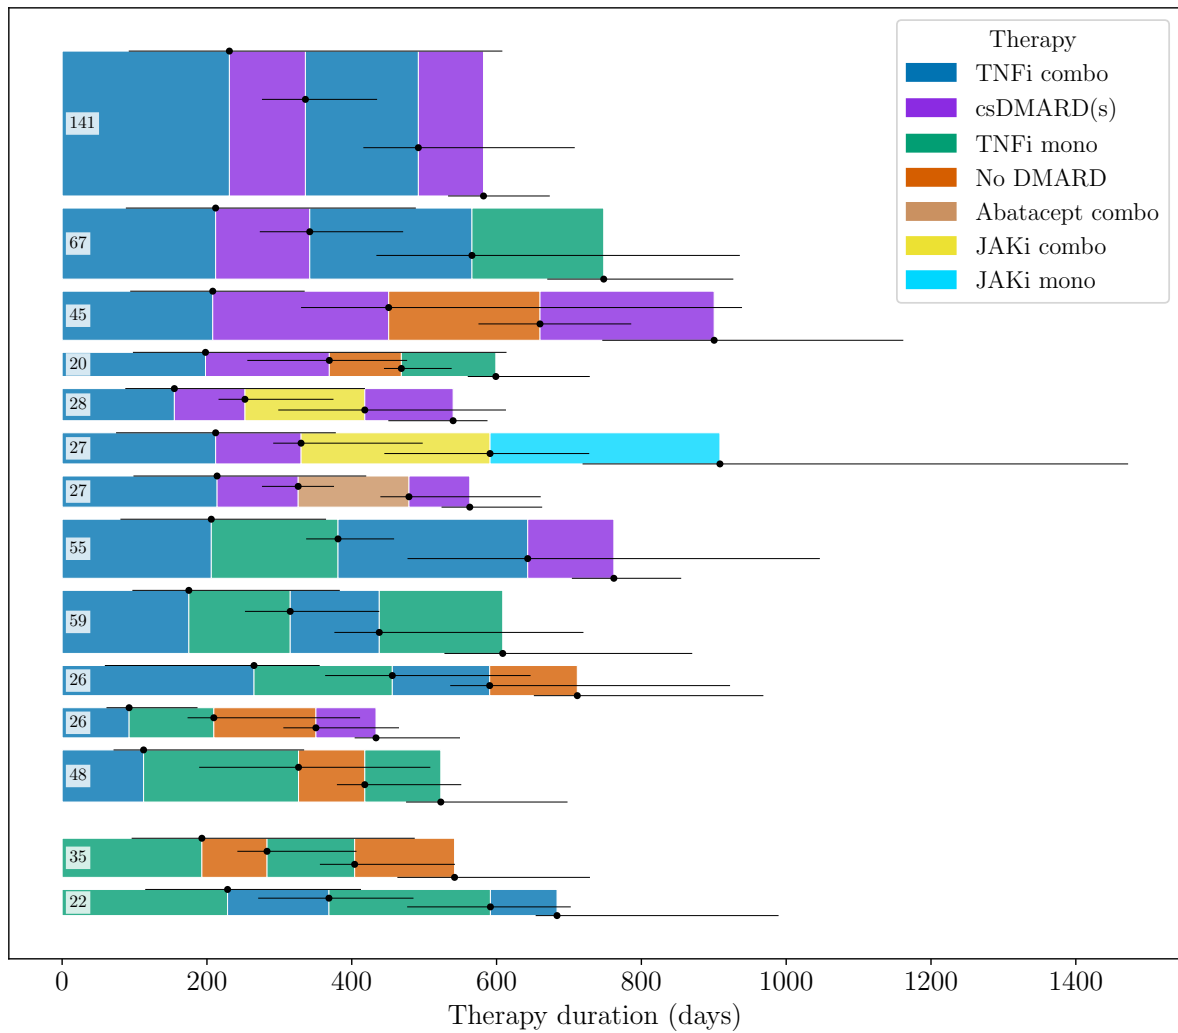

**Supplementary Figure 1: The most common treatment patterns for sequences of length four.** In total, 1649 patients were treated with at least four three therapies. Note, however, that some of the patients may have been treated with additional therapies afterwards. The numbers indicate how many patients were treated according to each pattern. Only patterns that occurred at least 20 times in the data are shown.

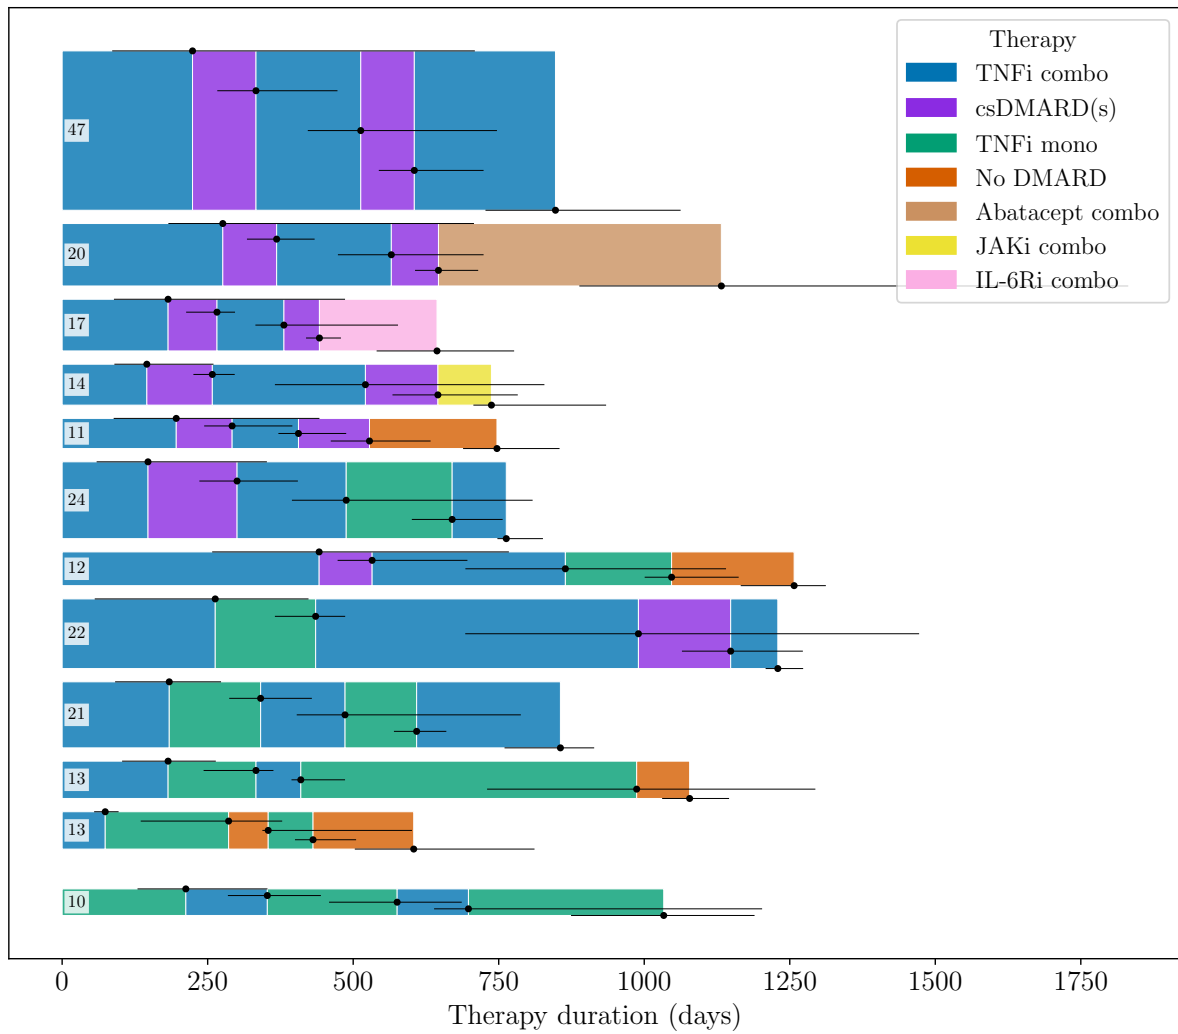

**Supplementary Figure 2: The most common treatment patterns for sequences of length five.** In total, 1133 patients were treated with at least five therapies. Note, however, that some of the patients may have been treated with additional therapies afterwards. The numbers indicate how many patients were treated according to each pattern. Only patterns that occurred at least 10 times in the data are shown.

**Supplementary Table 1: The main primary reasons for interventions in the most common patterns of up to length three. The percentages are calculated in relation to the number of patients providing at least one primary reason for the last intervention. Primary reasons provided by less than ten patients are not included.**

| Pattern                                            | Number of patients | Number of patients providing at least one primary reason for the <i>last</i> intervention | Most common primary reason, <i>n</i> (%)          | Second most common primary reason, <i>n</i> (%)  | Third most common primary reason, <i>n</i> (%) |
|----------------------------------------------------|--------------------|-------------------------------------------------------------------------------------------|---------------------------------------------------|--------------------------------------------------|------------------------------------------------|
| TNFi combo → csDMARD(s)                            | 1136               | 723                                                                                       | “Failure to maintain initial response”, 167 (23%) | “Minor side effect”, 118 (16%)                   | “Inadequate initial response”, 107 (15%)       |
| TNFi combo → csDMARD(s) → TNFi combo               | 423                | 84                                                                                        | “Active disease”, 36 (43%)                        | “Failure to maintain initial response”, 15 (18%) | “Inadequate initial response”, 10 (12%)        |
| TNFi combo → csDMARD(s) → non-TNFi b/tsDMARD combo | 269                | 74                                                                                        | “Active disease”, 47 (64%)                        | -                                                | -                                              |
| TNFi combo → csDMARD(s) → No DMARD                 | 150                | 72                                                                                        | “Minor side effect”, 18 (25%)                     | “Other reason”, 14 (19%)                         | “Temporary interruption”, 12 (17%)             |
| TNFi combo → TNFi mono                             | 734                | 410                                                                                       | “Minor side effect”, 129 (31%)                    | “Patient doing well”, 80 (20%)                   | “Patient preference”, 78 (19%)                 |
| TNFi combo → TNFi mono → TNFi combo                | 264                | 42                                                                                        | “Active disease”, 20 (48%)                        | “Minor side effect”, 10 (24%)                    | -                                              |
| TNFi combo → TNFi mono → No DMARD                  | 189                | 113                                                                                       | “Failure to maintain initial response”, 29 (26%)  | “Other reason”, 15 (13%)                         | “Inadequate initial response”, 11 (10%)        |

|                                                |     |     |                                                  |                               |                                         |
|------------------------------------------------|-----|-----|--------------------------------------------------|-------------------------------|-----------------------------------------|
| TNFi mono → No DMARD                           | 292 | 176 | “Failure to maintain initial response”, 42 (24%) | “Minor side effect”, 37 (21%) | “Inadequate initial response”, 28 (16%) |
| TNFi mono → No DMARD → TNFi mono               | 85  | 24  | “Active disease”, 13 (54%)                       | -                             | -                                       |
| TNFi mono → No DMARD → non-TNFi b/tsDMARD mono | 73  | 22  | “Active disease”, 18 (82%)                       | -                             | -                                       |
